# Supplementary material for: Insights into the base-pairing preferences of 8-oxoguanosine on the ribosome
Source: PubMed Central journal article supplement (PMC6765139; doi:10.1093/nar/gkz701), 2019-08-10
Supplement: gkz701_supplemental_file.pdf [file gkz701_supplemental_file.pdf]

## Supplementary Information

# Insights into the base-pairing preferences of 8-oxoguanosine on the ribosome

Erica N. Thomas, Carrie L. Simms, Hannah E. Keedy, and Hani S. Zaher\*

Department of Biology  
Washington University in St. Louis  
Campus Box 1137, One Brookings Drive  
St. Louis, MO, USA 63130  
Phone: (314) 935-7662  
Fax: (314) 935-4432

\*Correspondence: [hzaher@wustl.edu](mailto:hzaher@wustl.edu)

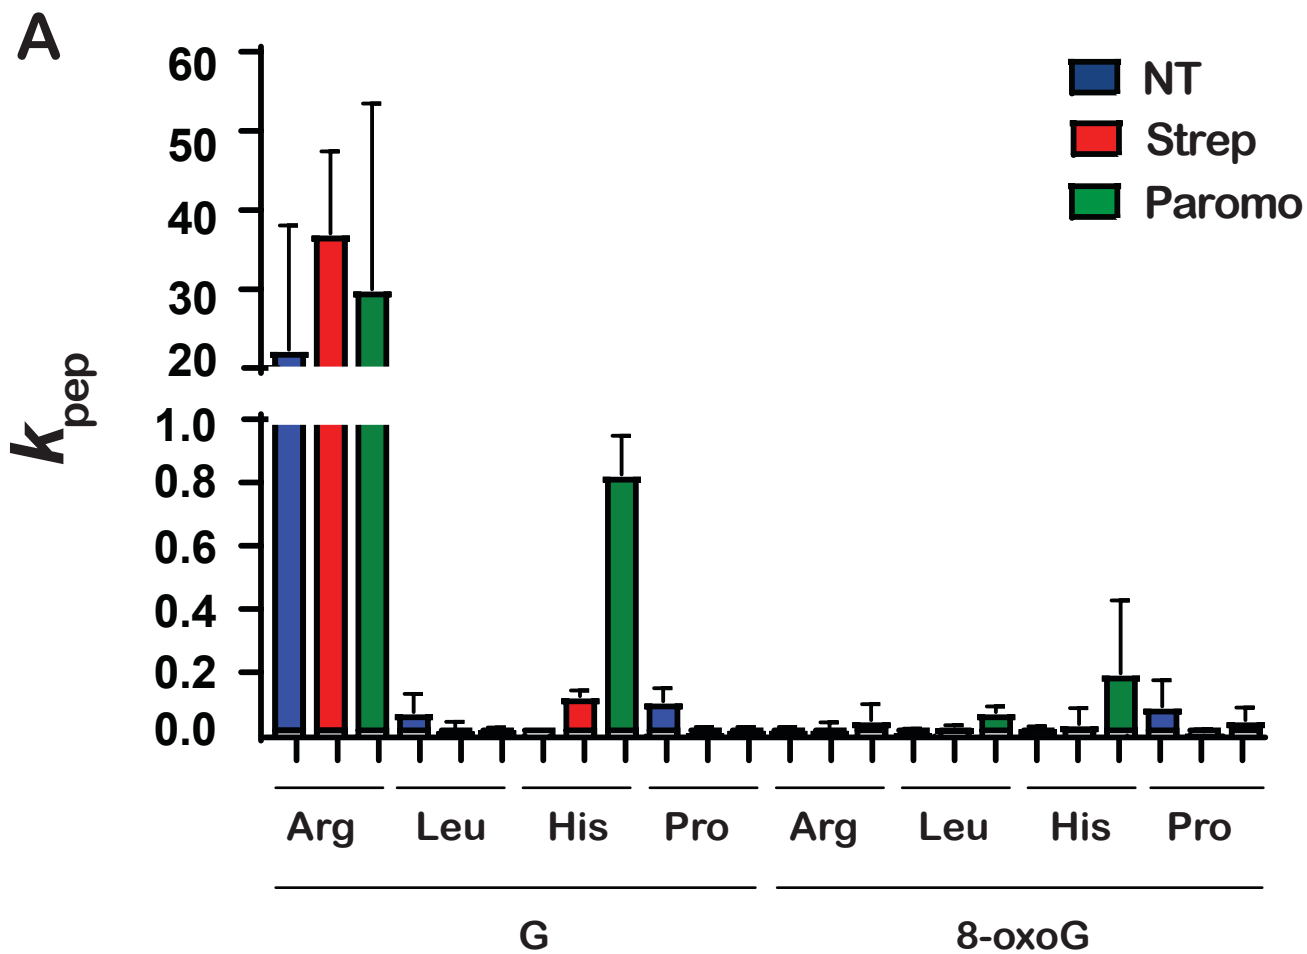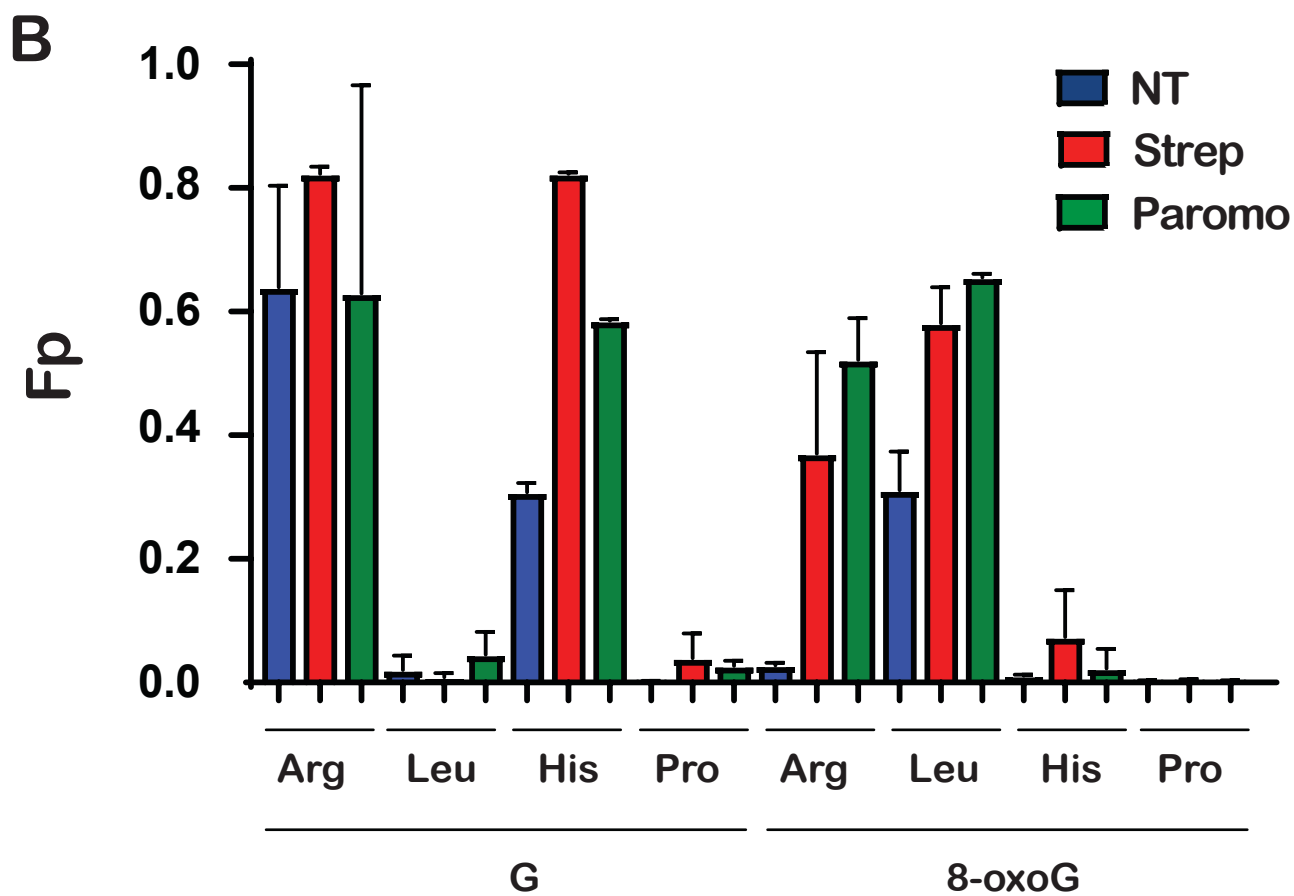

**Figure S1: Streptomycin and paromomycin suppress the effect of 8-oxoG at the second position of the codon.**

A) Bar graph showing the observed rates of peptide-bond formation ( $k_{\text{pep}}$ ) determined for complexes displaying the CGC (G) or  $C^{8\text{oxo}}\text{GC}$  (8-oxoG) with the indicated ternary complexes. B) Bar graph showing the end-point values obtained for reactions shown in A. Plotted is the mean of duplicate reactions with the error bars representing the standard deviation around the mean.

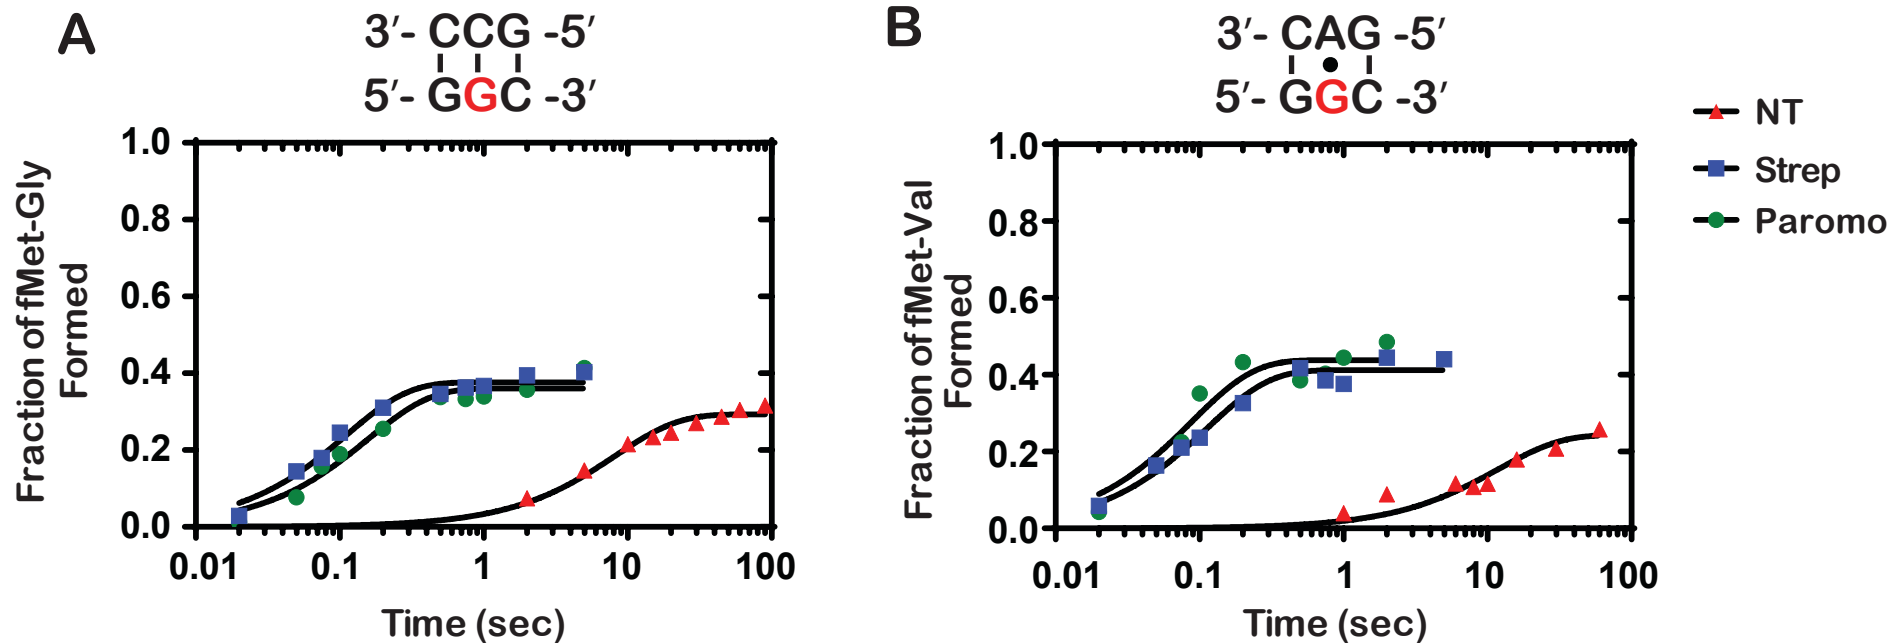

**Figure S2: Streptomycin and paromomycin suppress the effects of 8-oxoG on  $k_{pep}$  for a complex displaying the  $G^{8oxo}GC$  codon in the A site**

A-B) Time courses of peptide-bond formation between the indicated initiation and ternary complexes either in the absence of antibiotics or in the presence of paromomycin or streptomycin.

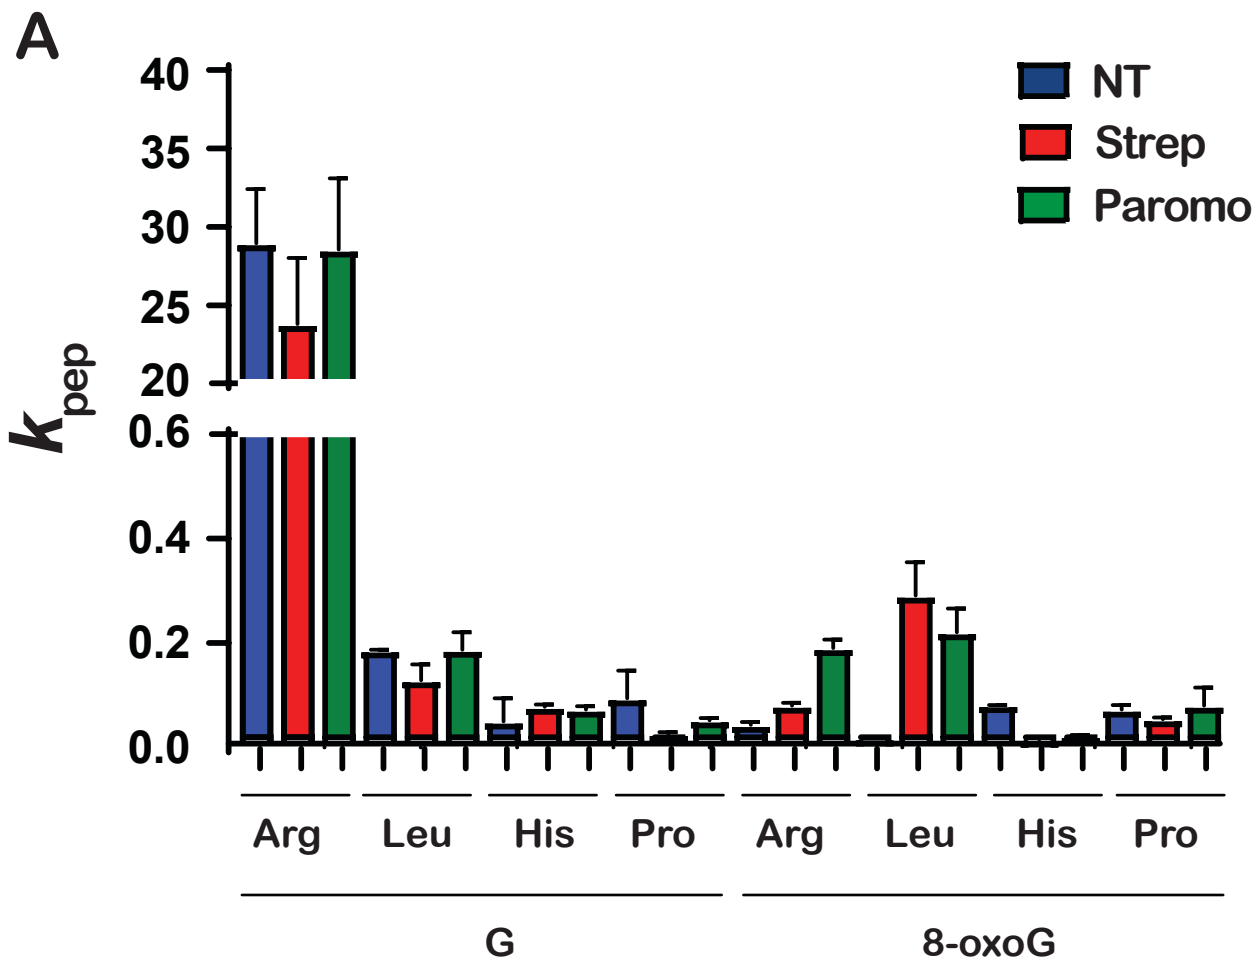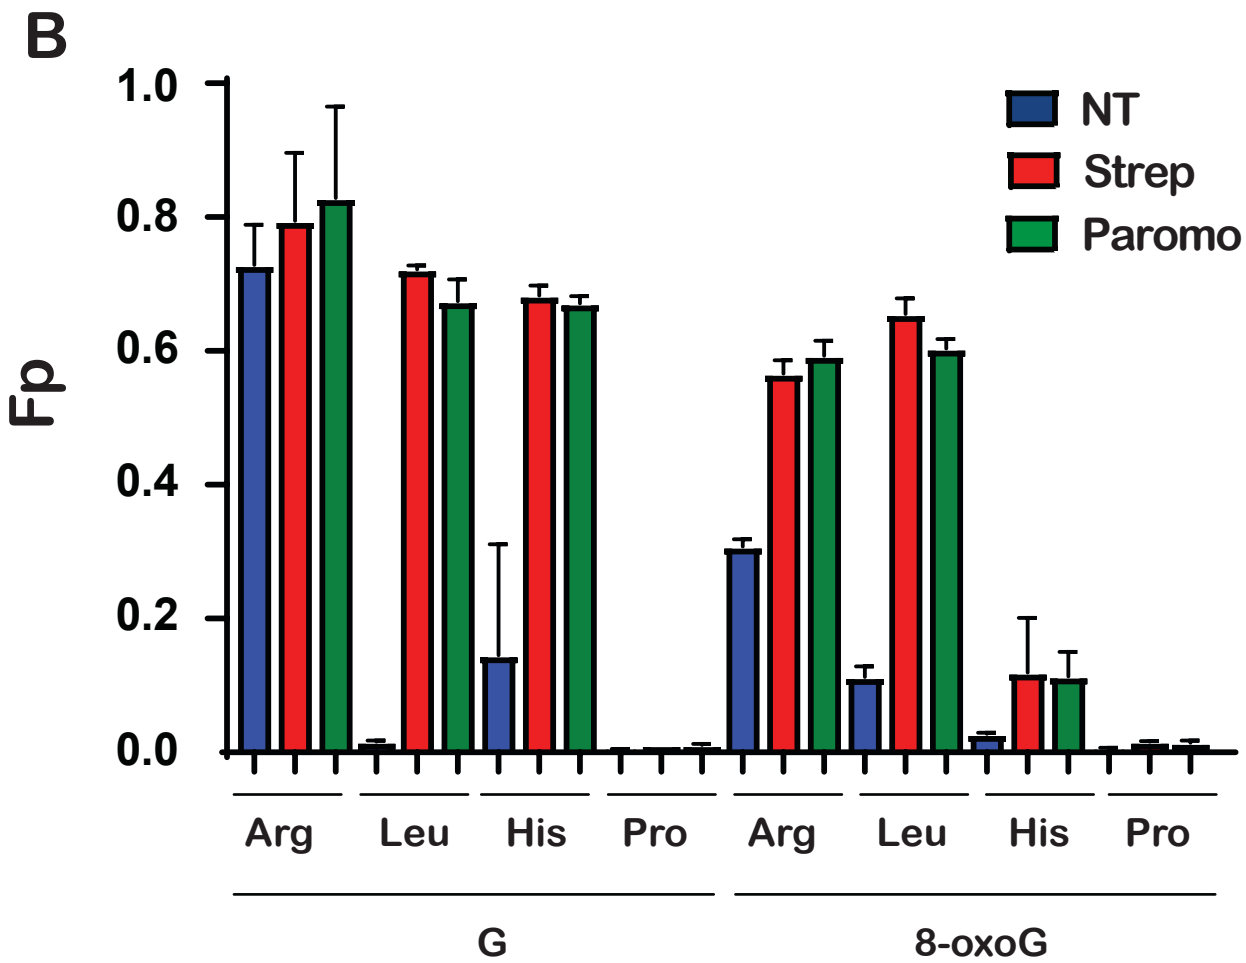

**Figure S3: Streptomycin and paromomycin suppress the effect of 8-oxoG at the first position of the codon.**

A) Bar graph showing the observed rates of peptide-bond formation ( $k_{\text{pep}}$ ) determined for complexes displaying the GUU (G) or  $^{\text{8oxo}}$ GUU (8-oxoG) with the indicated ternary complexes. B) Bar graph showing the end-point values obtained for reactions shown in A. Plotted is the mean of duplicate reactions with the error bars representing the standard deviation around the mean.
